# Supplementary material for: Total sulfur determination in petroleum fuels for routine quality control by sector field inductively coupled plasma mass spectrometry after dilution treatment
Source: Royal Society of Chemistry journal article supplement (doi:10.1039/c9ja00005d), 2019-01-01
Supplement: c9ja00005d1.pdf [file c9ja00005d1.pdf]

## Supplementary information for

### Total Sulfur Determination in Petroleum Fuels for Routine Quality Control by Sector Field Inductively Coupled Plasma Mass Spectrometry after Dilution Treatment

Chien-Wei-Lu<sup>a, b</sup>, Huan-Yi Hung<sup>b</sup>, Hsin-Chen Sung<sup>c</sup>, Yiong-Shing Sheu<sup>c</sup>, Wen-Lung Lin<sup>b</sup>, Shu-Pao Wu<sup>a\*</sup>

*<sup>a</sup>Department of Applied Chemistry, National Chiao Tung University, Science Building 2, 1001 Ta Hsueh Road, Hsinchu, Taiwan*

*<sup>b</sup>Industrial Technology Research Institute 195, Sec. 4, Chung Hsing Rd., Chutung, Hsinchu, Taiwan*

*<sup>c</sup>Recycling Fund Management Board, Environmental Protection Administration, Executive Yuan, Taipei, Taiwan*

#### Contents

1. **Figure S1** Kinematic viscosities of four petroleum fuel samples with different dilution factors, (a) gasoline samples (IEG-2, AG-2) and (b) diesel samples (IBD-1, AD-2). Error bars represent standard deviation for three tests
2. **Figure S2** The appearances of sampler cone and skimmer cone after introducing organic samples, (a) with adding oxygen and (b) without adding oxygen.
3. **Figure S3** The spectral interference of <sup>32</sup>S and <sup>34</sup>S with different flow rates of oxygen at medium resolution, (a) 0.150 L min<sup>-1</sup>; (b) 0.280 L min<sup>-1</sup>; (c) 0.300 L min<sup>-1</sup> and (d) 0.330 L min<sup>-1</sup>.

(a)

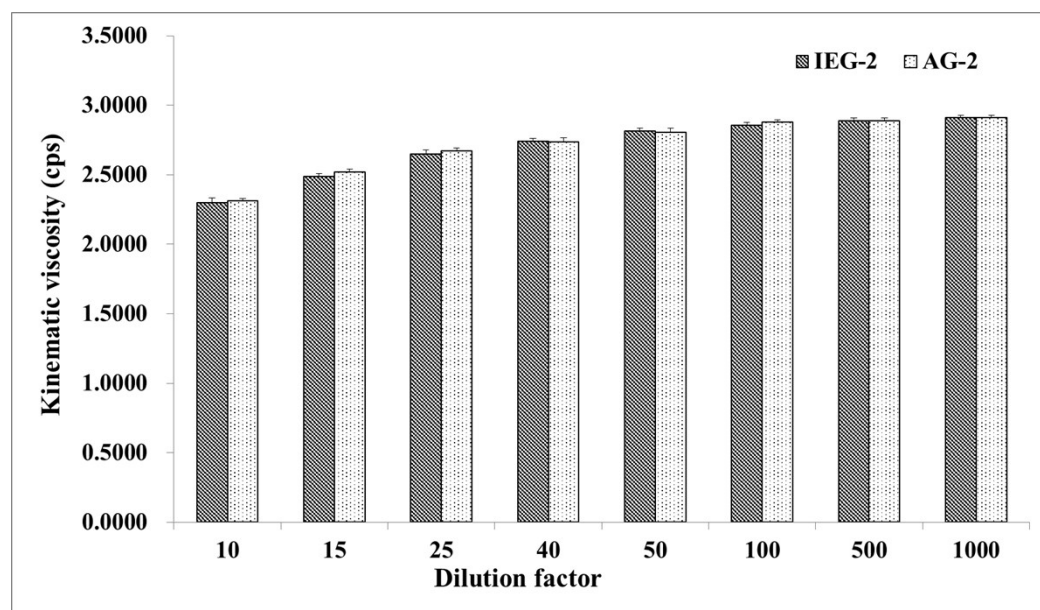

(b)

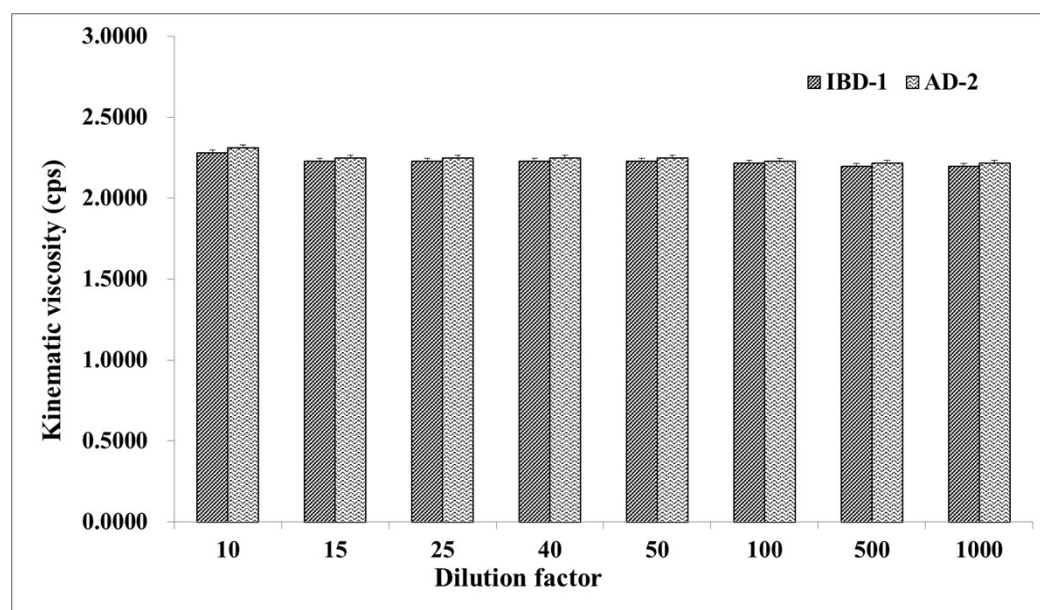

**Figure S1** Kinematic viscosities of four petroleum fuel samples with different dilution factors, (a) gasoline samples (IEG-2, AG-2) and (b) diesel samples (IBD-1, AD-2). Error bars represent standard deviation for three tests.

(a)

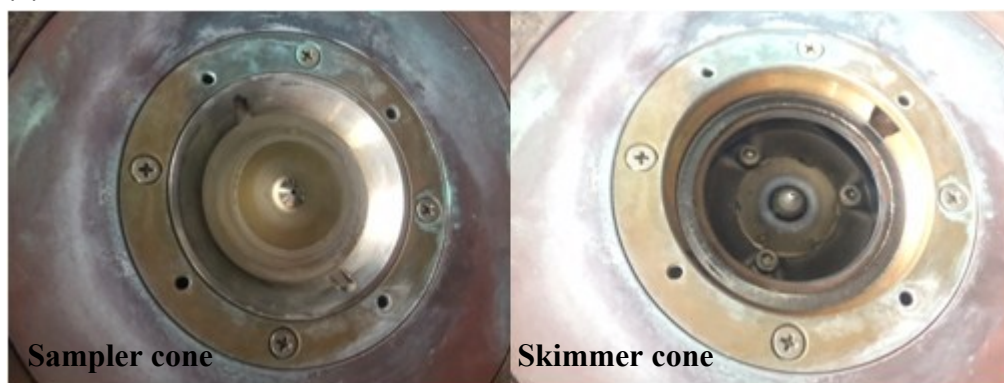

(b)

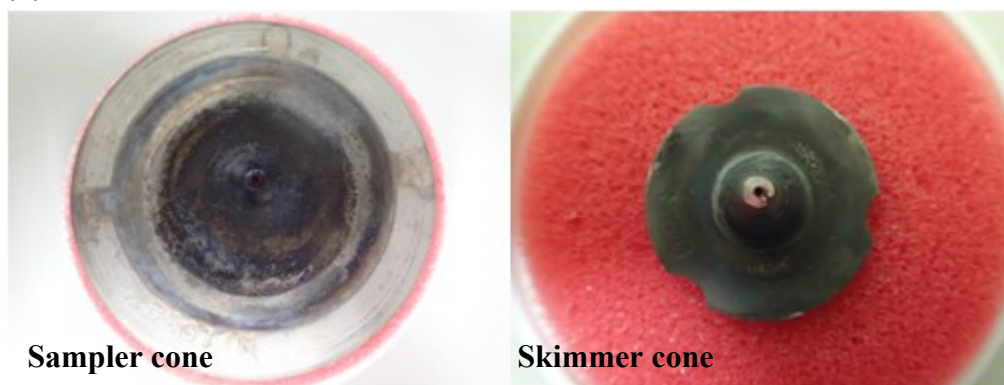

**Figure S2** The appearances of sampler cone and skimmer cone after introducing organic samples, (a) with adding oxygen and (b) without adding oxygen.

(a) O<sub>2</sub> flow rate: 0.150 L min<sup>-1</sup>

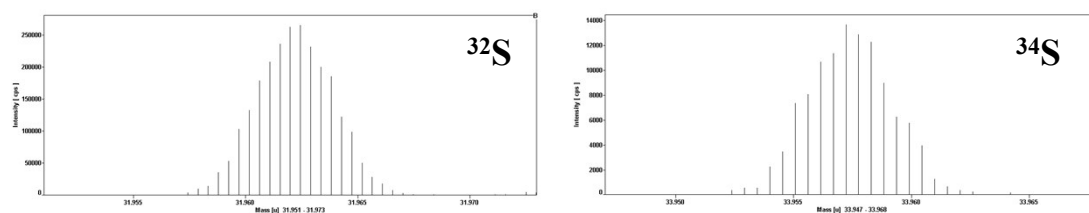

(b) O<sub>2</sub> flow rate: 0.280 L min<sup>-1</sup>

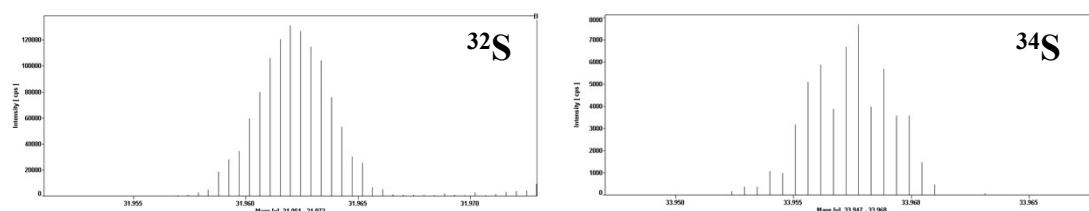

(c) O<sub>2</sub> flow rate: 0.300 L min<sup>-1</sup>

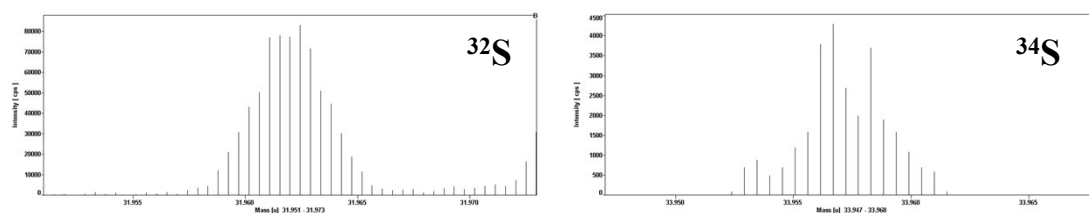

(d) O<sub>2</sub> flow rate: 0.330 L min<sup>-1</sup>

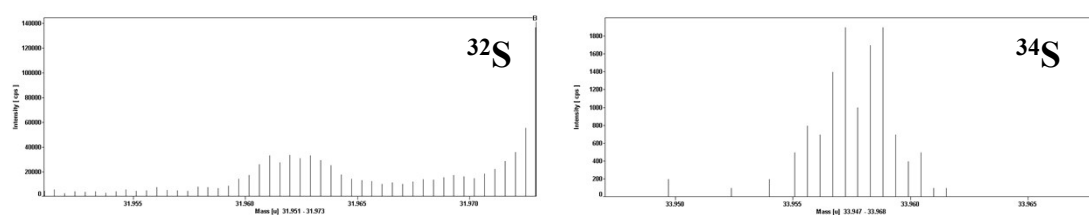

**Figure S3** The spectral interference of <sup>32</sup>S and <sup>34</sup>S with different flow rates of oxygen at medium resolution, (a) 0.150 L min<sup>-1</sup> ; (b) 0.280 L min<sup>-1</sup> ;(c) 0.300 L min<sup>-1</sup> and (d) 0.330 L min<sup>-1</sup>.
